# Supplementary material
Source: HighWire-hosted journal article supplement (https://sti.bmj.com/content/sextrans-2021-055031)
Supplement: inline-supplementary-material-2 [file inline-supplementary-material-2.csv]

record_id	public_pvt_high	gender	hiv_one_sexual_encounter	hiv_sexual_frequency	arv_risk_reduction	consequence_stop_hiv_tx___2	transmit	transmit_1y	transmit_art	transmit_art_1y	food_secure	tuition2	healthinsurance	ART_prev_efficacy_1y	age_cat	prov	housing	ses_index	months_test	hiv_index	HIVriskp_index1	arv_risk_reduction2	hiv_one_sexual_encounter2	hiv_sexual_frequency2
428	Public	2	1	4	4	0	100	100	75	75	1	Parents	Private	25	18-19	1	Other	high		High knowledge	1	0	1	0
429	Public	2	1	4	4	1	100	100	100	100	1	Student loans	Private	0	18-19	1	Student residence		<6	High knowledge	1	0	1	0
430	Public	1	2	1	3	1	15	95	75	65	0	Student loans	none	31.578947	18-19	2	Student residence		<6	low knowlegde	1	0	1	1
431	Public	1	2	1	3	0	65	100	45	50	1	Parents	none	50	18-19	1	Other	medium		low knowlegde	0	0	1	1
432	Public	1	1	1	1	0	95	90	95	95	1	Student loans	none	0	18-19	1		high	6 to <12	High knowledge	0	1	1	1
433	Public	1	1	2	4	1	95	100	75	90	1	Student loans	none	10	18-19	1		low		High knowledge	1	0	1	1
434	Public	1	1	1	1	0	85	65	50	40	1	Parents	none	38.46154	20-25	1	Other	low	<6	High knowledge	0	1	1	1
435		1	1	4	2	1	70	75	50	100	1	Student loans	none	0	20-25	2	Other	low	<6	low knowlegde	1	1	1	0
436	Public	1	1	4	4	1	65	100	50	60	0	Student loans	none	40	20-25	1	Student residence	low		High knowledge	1	0	1	0
437		2	1	4	3	0	25	20	60	60	1	Student loans	none	0	20-25	2			12 to <24	High knowledge	1	0	1	0
438	Public	2	1	2	2	0	25	30	95	90	0	Student loans	none	0	18-19	2	Student residence	low	<6	low knowlegde	0	1	1	1
440	Public	2	1	4	1	1	95	95	50	100	0	Student loans	none	0	20-25	2			<6	High knowledge	1	1	1	0
441	Public	2	1	4	2	0	80	95	60	70	1	Parents	none	26.31579	18-19	2	Other	medium		High knowledge	1	1	1	0
442	Public	1	1	4	3	0	100	100	95	90	1	Student loans	none	10	20-25	1	Student residence	medium	<6	low knowlegde	1	0	1	0
443	Public	1	1	2	3	0	90	100	90	90	1	Other	none	10	18-19	1	Other			High knowledge	0	0	1	1
444	Public	1	1	2	4	0	100	100	100	75	1	Student loans	none	25	18-19		Other	medium	<6	High knowledge	1	0	1	1
445		1	1	2	2	0	65	95	65	75	1	Student loans	Private	21.052631	20-25	1			12 to <24	low knowlegde	0	1	1	1
446		1	2	1	4	1	100	100	75	75	1	Student loans	Private	25	18-19	2	Student residence	medium	6 to <12	High knowledge	1	0	1	1
447	Public	2	1	4	3	0	100	100	100	100	1	Parents	Private	0	18-19	2	Other	high		High knowledge	1	0	1	0
448		1	2	2	2	0	75	100	50	65	1	Student loans	none	35	18-19	2	Other	medium	6 to <12	High knowledge	0	1	1	1
449	Public	2	1	2	2	0	100	100	75	100	1	Other	Private	0	18-19	1	Student residence	high	<6	High knowledge	0	1	1	1
450	Public	2	1	4	2	0	60	100	70	100	1	Other	none	0	18-19	1	Student residence	medium	12 to <24	High knowledge	1	1	1	0
451	Public	1	1	2	3	1	95	5	5	95	1	Other	none	0	20-25	2	Student residence	low	<6	low knowlegde	1	0	1	1
452	Public	1	1	4	2	1	50	100	25	45	1	Parents	Private	55	18-19	1	Other	high		low knowlegde	1	1	1	0
453	Public	1	1	1	1	0	100	100	75	75	1	Parents	Private	25	20-25	2	Student residence			High knowledge	0	1	1	1
454	Private	1	1	1	1	0	25	45	25	15	0	Other	Private	66.666664	20-25	2	Student residence	high		low knowlegde	0	1	1	1
455	Public	2	1	3	3	0	100	100	100	100	1	Student loans	none	0	18-19	1	Other	medium	<6	High knowledge	1	0	1	0
456	Public	1	2	4	3	1	100	100	80	75	0	Parents	none	25	18-19	1	Student residence	low	<6	low knowlegde	1	0	1	0
457		1	1	1	1	0	65	100	95	100	1	Student loans	none	0	18-19	2	Student residence	high		High knowledge	0	1	1	1
459	Public	2	1	3	2	0	100	75	100	90	0	Student loans	Private	0	20-25	2	Student residence			low knowlegde	0	1	1	0
460	Public	2	2	4	4	1	50	50	50	50	1	Other	Private	0	20-25	2	Student residence	high	<6	High knowledge	1	0	1	0
461	Private	2	1	4	1	1	100	100	100	100	0	Parents	Private	0	18-19	1	Student residence	high	<6	High knowledge	1	1	1	0
462		1	1	1	1	1	80	100	40	50	1	Student loans	none	50	20-25	2	Student residence	medium	<6	High knowledge	0	1	1	1
463	Private	1	1	4	1	1	95	100	95	90	1	Parents	none	10	18-19	1	Other	high		High knowledge	1	1	1	0
464	Public	1	3	2	1	1	50	100	50	50	1	Parents	Private	50	20-25	2	Student residence	medium	<6	High knowledge	1	1	0	1
465	Public	1	1	2	1	0	80	90	60	60	1	Student loans	none	33.333332		1		low	<6	High knowledge	0	1	1	1
466	Public	2	1	3	3	1	35	50	75	90	1	Student loans	none	0	20-25	1		low	<6	low knowlegde	1	0	1	0
467	Public	2	1	4	2	1	65	100	90	90	0	Student loans	none	10	18-19	1	Student residence			High knowledge	1	1	1	0
468	Public	2	1	4	4	1	100	100	85	85	1	Student loans	none	15	18-19	1	Other	medium	12 to <24	low knowlegde	1	0	1	0
469	Private	1	1	1	2	0	60	95	10	50	1	Parents	Refuse to answer	47.36842	20-25	1	Other	low	<6	low knowlegde	0	1	1	1
471	Public	2	1	4	3	0	100	55	85	95	1	Parents	none	0	18-19	2	Other			High knowledge	1	0	1	0
472		1	1	3	3	0	65	65	65	65	1	Student loans	Refuse to answer	0	20-25	2	Student residence	medium		low knowlegde	1	0	1	0
473	Public	1	1	4	1	0	75	100	100	100	1	Student loans	none	0	20-25	1	Student residence	low		High knowledge	0	1	1	0
474	Public	1	1	1	1	0	100	100	100	100	1	Other	none	0	20-25	1	Student residence		<6	High knowledge	0	1	1	1
475	Public	2	1	1	2	1	100	100	50	75	1	Student loans	Private	25	18-19	1	Student residence	high	<6	High knowledge	0	1	1	1
476	Public	2	1	2	1	0	85	100	60	50	1	Parents	Private	50	18-19	1	Other	high	<6	High knowledge	0	1	1	1
477		2	2	1	2	0	75	100	50	65	1	Student loans	none	35	20-25	2	Other	medium	<6	low knowlegde	0	1	1	1
478	Public	2	1	1	3	1	85	100	75	40	1	Student loans	none	60	20-25	1	Student residence	low	<6	low knowlegde	0	0	1	1
479	Public	2	1	2	3	0	100	100	100	100	1	Parents	none	0	18-19	2	Student residence	low	<6	High knowledge	0	0	1	1
480	Public	2	1	3	2	0	50	90	75	100	1	Parents	Private	0	20-25	2	Other	low		low knowlegde	0	1	1	0
481	Private	2	1	4	4	0	100	100	50	40	1	Parents	Private	60	18-19	2	Other	high		High knowledge	1	0	1	0
482		2	1	4	1	1	65	90	50	50	1	Student loans	none	44.444443	18-19	2	Student residence	low	<6	low knowlegde	1	1	1	0
483	Public	2	1	3	2	1	70	100	0	50	1	Other	none	50	20-25	2	Other	low	<6	low knowlegde	1	1	1	0
484	Private	1	1	1	1	0	100	100	100	100	1	Student loans	none	0	18-19	1	Student residence	high		High knowledge	0	1	1	1
485	Public	1	1	4	3	0	90	100	50	75	1	Student loans	none	25	18-19	2		high		High knowledge	1	0	1	0
486	Public	1	1	1	4	0	100	100	100	100	1	Parents	none	0	18-19	2			<6	low knowlegde	0	0	1	1
487	Public	2	1	4	1	0	95	100	50	100	1	Student loans	Private	0	18-19	2	Student residence	high		low knowlegde	0	1	1	0
488	Private	2	1	1	1	0	100	100	100	75	1	Parents	none	25	20-25	1	Other	high		low knowlegde	0	1	1	1
489	Private		1	1	4	0	50	90	55	85	1	Parents	Private	5.5555553		2	Other	high	6 to <12	low knowlegde	0	0	1	1
490	Public	1	1	1	1	0	100	100	0	100	1	Parents	Private	0	20-25	1	Other	high		low knowlegde	0	1	1	1
491	Public	2	1	1	4	0	100	100	100	100	1	Parents	none	0	18-19	1	Other	medium	<6	High knowledge	0	0	1	1
492	Public	1	1	1	2	0	75	100	60	100	1	Parents	Private	0	20-25	2	Student residence	high		High knowledge	0	1	1	1
493		1	1	3	3	0	90	100	65	75	0	Student loans	none	25	20-25	2	Student residence			High knowledge	1	0	1	0
494	Private	1	1	2	2	1	90	100	65	95	1	Student loans	none	5	18-19	1		medium	24+	low knowlegde	0	1	1	1
495	Public	1	1	4	3	0	90	100	45	75	1	Parents	Private	25	18-19	1	Student residence		<6	High knowledge	1	0	1	0
496	Private	1	1	3	2	0	90	100	60	100	1	Student loans	Private	0	20-25	1	Student residence	medium		low knowlegde	0	1	1	0
497	Public	2	1	2	3	1	95	100	5	10	0	Student loans	Private	90	18-19	1	Other	high	<6	low knowlegde	1	0	1	1
499	Public	1	1	1	2	0	90	100	80	95	1	Student loans	Private	5	18-19	1	Student residence			High knowledge	0	1	1	1
500	Private	1	1	1	4	0	100	100	100	100	0	Student loans	Refuse to answer	0	20-25	2	Student residence	medium	<6	low knowlegde	0	0	1	1
501	Public	1	1	1	1	0	75	100	40	75	1	Parents	none	25	18-19	1	Other		6 to <12	High knowledge	0	1	1	1
502	Private	1	1	4	3	0	85	100	95	75	1	Other	none	25	18-19	2	Other	high		low knowlegde	1	0	1	0
503	Public	2	1	1	1	1	100	100	10	20	1	Student loans	none	80	18-19	1	Other	low	<6	High knowledge	0	1	1	1
504	Public	2	1	4	1	0	100	100	100	100	1	Student loans	none	0	18-19	2	Student residence			High knowledge	0	1	1	0
505	Private	2	1	4	2	1	100	100	100	100	1	Parents	Refuse to answer	0	20-25	2	Student residence	high	<6	High knowledge	1	1	1	0
506	Public	2	1	1	1	0	100	100	75	50	1	Student loans	none	50	20-25	2	Student residence	high		High knowledge	0	1	1	1
510	Public	2	1	3	3	1	65	100	50	75	1	Parents	Private	25	20-25	1	Student residence	high	<6	low knowlegde	1	0	1	0
511		2	1	2	3	0	95	100	80	80	1	Parents	Private	20	20-25	1	Student residence	high	6 to <12	High knowledge	0	0	1	1
512		2	1	3	2	0	40	100	15	75	1	Parents	Private	25	20-25	2	Student residence	high	<6	High knowledge	0	1	1	0
513		2	2	2	4	1	45	100	45	70	1	Parents	Private	30	20-25	1		high		low knowlegde	1	0	1	1
514		1	1	1	2	0	45	100	15	0	1	Student loans	none	100	18-19	1	Other		<6	low knowlegde	0	1	1	1
515	Public	1	1	1	1	1	95	100	85	85	1	Student loans	none	15	18-19	2	Other	low		High knowledge	0	1	1	1
516		1	1	1	3	1	90	100	65	100	1	Student loans	none	0	18-19	1	Other	medium		High knowledge	0	0	1	1
517	Public	2	1	4	3	1	10	5	20	10	1	Parents	none	0	20-25	2	Student residence	medium	<6	High knowledge	1	0	1	0
518		1	1	1	1	0	25	10	20	20	1	Parents	Private	0	20-25	1	Student residence	high	<6	High knowledge	0	1	1	1
519		2	1	1	2	1	60	90	65	80	0	Student loans	none	11.111111		1	Other	low	<6	low knowlegde	0	1	1	1
520	Private	1	1	4	1	1	95	100	75	85	1	Student loans	Private	15	18-19	2	Student residence	high	<6	High knowledge	1	1	1	0
521	Public	1	1	3	2	0	70	100	55	50	0	Student loans	none	50	18-19	1	Student residence	medium	12 to <24	High knowledge	0	1	1	0
522	Public	1	2	1	3	0	80	100	45	40	1	Student loans	Refuse to answer	60	18-19	1	Student residence	low		low knowlegde	0	0	1	1
523	Public	1	1	4	1	1	100	100	75	75	1	Student loans	none	25	18-19	1	Student residence	low		High knowledge	1	1	1	0
524	Public	2	2	2	2	0	65	100	100	100	1	Student loans	none	0	20-25	1	Other	medium	<6	low knowlegde	0	1	1	1
525	Public	2	1	4	4	1	100	75	25	100	0	Student loans	none	0	20-25	1	Student residence	medium		High knowledge	1	0	1	0
527	Public	2	1	1	1	0	75	75	60	75	1	Parents	Private	0	20-25	1	Student residence	medium	6 to <12	High knowledge	0	1	1	1
528		2	1	2	3	0	100	100	75	80	1	Parents	Private	20	20-25	2	Other	high	<6	low knowlegde	0	0	1	1
529		2	1	4	4	0	75	100	100	75	0	Student loans	Refuse to answer	25	20-25	1	Student residence	medium		High knowledge	1	0	1	0
530	Public	2	1	1	2	1	50	100	35	30	1	Student loans	none	70	18-19	2	Student residence	low	<6	low knowlegde	0	1	1	1
531	Public	2	1	4	3	1	85	100	55	80	1	Student loans	Private	20	18-19	1	Student residence	high	<6	High knowledge	1	0	1	0
532	Public	1	1	1		0	95	85	65	75	1	Parents	Private	11.764706	20-25	1	Other	high	<6	High knowledge	0		1	1
533	Public	2	1	2	2	0	60	75	50	50	1	Student loans	none	33.333332	20-25	1	Other	medium		High knowledge	0	1	1	1
535	Public	2	1	4	2	1	90	100	80	95	1	Student loans	Private	5	20-25	1	Student residence	low		High knowledge	1	1	1	0
536	Public	2	1	3	1	0	95	95	95	50	1	Student loans	none	47.36842	18-19	1	Student residence	medium		low knowlegde	0	1	1	0
537	Public	1	1	1	3	0	100	100	70	100	1	Parents	Refuse to answer	0	18-19	2	Other	high	<6	High knowledge	0	0	1	1
538	Private	1	1	3	3	1	100	100	100	100	1	Parents	Private	0	18-19	1	Other	high	12 to <24	High knowledge	1	0	1	0
539	Public	2	1	1	1	0	60	60	40	40	1	Parents	Private	33.333332	18-19	2	Student residence	high		low knowlegde	0	1	1	1
540	Public	2				0	50	90	50	65	1	Parents	Refuse to answer	27.777779	18-19	2	Other	high		low knowlegde	0
541	Private	1	2	3	1	0	100	100	75	100		Student loans	Refuse to answer	0	18-19	2	Student residence			low knowlegde	0	1	1	0
542	Public	1	1	2	2	0	100	50	100	100	1	Student loans	none	0	20-25	1	Student residence	low	24+	High knowledge	0	1	1	1
543	Public	2	1	4	1	1	100	100	50	100	1	Parents	Refuse to answer	0	20-25	2	Other	high	6 to <12	High knowledge	1	1	1	0
544	Public	2	1	2	3	0	70	100	50	50	1	Other	Private	50	20-25	1	Other	high	<6	High knowledge	0	0	1	1
545	Private	1	1	3	2	0	80	100	50	50	1	Parents	Private	50	18-19	1	Other	high		low knowlegde	0	1	1	0
546		1	1	1	4	0	100	100	50	75	1	Student loans	none	25	20-25	1	Student residence	high		High knowledge	0	0	1	1
547	Public	1	1	1	4	0	100	100	100	100	1	Parents	none	0	20-25	2	Other	low	<6	High knowledge	0	0	1	1
548	Public	2	1	2	3	0	20	20	20	20	1	Student loans	none	0	20-25	2	Student residence	medium		low knowlegde	0	0	1	1
550	Public	2	1	4	2	1	75	100	80	100	1	Student loans	Private	0	20-25	1	Other	high	<6	low knowlegde	1	1	1	0
551	Public	1	1	1	1	0	85	55	60	50	0	Student loans	Private	9.090909	20-25	1	Student residence	high	<6	High knowledge	0	1	1	1
552	Public	1	2	1	1	0	5	5	5	5	1	Student loans	none	0	20-25	1	Student residence		<6	low knowlegde	0	1	1	1
553	Public	1	1	4	1	0	100	100	100	100	1	Student loans	none	0	20-25	2	Other	medium	<6	low knowlegde	0	1	1	0
554	Public	1	2	1	2	0	35	100	70	75	0	Student loans	none	25		1	Student residence	medium	<6	High knowledge	0	1	1	1
555	Public	1	1	2	2	1	45	90	35	60	1	Student loans	none	33.333332	20-25	2	Other	low		low knowlegde	0	1	1	1
557	Public	1	1	1	1	0	100	75	60	95	1	Parents	none	0			Student residence	low	<6	low knowlegde	0	1	1	1
558		1	1	2	2	0	100	100	100	35	1	Student loans	none	65	18-19	1	Other	medium		low knowlegde	0	1	1	1
559	Public	1	1	1	2	0	100	100	60	60		Student loans	Refuse to answer	40	18-19	2	Student residence		<6	low knowlegde	0	1	1	1
561	Public	1	1	1	2	0	100	100	25	25	1	Parents	Private	75	20-25	2	Other	high	<6	low knowlegde	0	1	1	1
562		1	1	2	1	0	50	100	100	75	1	Student loans	none	25	20-25	2	Other	medium	<6	High knowledge	0	1	1	1
564	Public		1	3	2	1	50	100	35	100	0	Student loans	none	0	20-25	2	Student residence	medium	<6	High knowledge	1	1	1	0
565	Public	1	1	1	3	1	100	100	100	0	0	Student loans	none	100	18-19	1	Student residence			low knowlegde	0	0	1	1
566	Private	2	1	1	2	0	95	100	85	75	1	Parents	Private	25	18-19	1	Student residence	medium	<6	low knowlegde	0	1	1	1
567	Public	2	1	1	2	0	82.5	100	75	80	1	Student loans	none	20	20-25	1	Student residence	low	<6	low knowlegde	0	1	1	1
568	Public	2	1	4	1	1	90	100	90	90	1	Parents	none	10	18-19	1	Student residence	low	<6	High knowledge	1	1	1	0
569	Public	1	1	4	4	0	100	100	100	100	0	Student loans	none	0	20-25	1	Student residence	low	<6	High knowledge	1	0	1	0
570	Public	2	1	1	1	0	100	100	100	100	1	Student loans	none	0	18-19	2	Other	medium	<6	High knowledge	0	1	1	1
571	Public	1	1	2	2	0	70	5	100	100	1	Parents	Private	0	18-19	1	Other	high		low knowlegde	0	1	1	1
572	Public	1	1	2	3	0	50	100	25	60	1	Parents	Private	40	18-19	1	Other	high		low knowlegde	0	0	1	1
573	Public	1	1	4	2	0	40	75	90	95	1	Student loans	none	0	20-25	1	Student residence			low knowlegde	1	1	1	0
574	Public	1	1	3	2	0	75	5	100	100	1	Student loans	Private	0	20-25	1	Student residence	high	<6	High knowledge	0	1	1	0
575	Private	2	1	4	2	1	65	100	50	90	1	Student loans	none	10	18-19	1	Other	low	<6	High knowledge	1	1	1	0
576	Private	2	1	1		1	100	100	30	45	1	Student loans	Private	55	18-19	2	Student residence	high		High knowledge	0		1	1
577	Public	2	1	1	1	0	75	95	65	65	0	Student loans	Private	31.578947	18-19	2	Student residence	high	<6	low knowlegde	0	1	1	1
578	Public	1	1	2	2	1	90	50	55	60	0	Parents	none	0	18-19	1	Other	low		low knowlegde	0	1	1	1
579	Public	1	2	3	2	0	60	45	85	25	1	Student loans	Private	44.444443	20-25	1				low knowlegde	1	1	1	0
580	Public	2	1	1	2	1	85	100	40	65	1	Student loans	none	35	18-19	2	Student residence	low		low knowlegde	0	1	1	1
581	Public	2	1	2	2	0	70	100	80	50	1	Other	Private	50	20-25	2	Student residence	low	<6	High knowledge	0	1	1	1
582	Public	1	1	1	2	0	100	100	95	90	1	Student loans	none	10	18-19	1	Student residence	medium		low knowlegde	0	1	1	1
583	Private	1	3	1	2	1	90	95	65	75	1	Student loans	Refuse to answer	21.052631	18-19	2	Other	high		low knowlegde	1	1	0	1
586	Public	1	1	2	2	1	35	40	95	100	1	Student loans	none	0	18-19	2	Student residence	high	24+	low knowlegde	0	1	1	1
587	Public	1	1	1	4	0	100	100	80	50	1	Parents	none	50	20-25	2	Other	medium		High knowledge	0	0	1	1
588	Public	1	2	2	2	1	75	100	75	25	0	Student loans	none	75	20-25	1	Student residence	low		High knowledge	1	1	1	1
589	Public	1	1	2	2	0	50	80	50	65	1	Student loans	none	18.75	20-25	2		medium	<6	High knowledge	0	1	1	1
590	Private	1	2	2	1	0	100	100	40	65	1	Student loans	none	35	18-19	2	Student residence		24+	low knowlegde	0	1	1	1
591	Public	1	1	1	1	0	25	75	50	50	0	Student loans	none	33.333332	20-25	2	Student residence	low	<6	low knowlegde	0	1	1	1
592	Public	1	1	3	3	0	90	100	90	90	1	Student loans	none	10	20-25	1	Other	low		low knowlegde	1	0	1	0
593	Public	1	1	4	4	0	100	100	100	100	1	Student loans	none	0	18-19	1	Student residence	low		High knowledge	1	0	1	0
594	Public	1	1	3	3	0	50	25	50	75	1	Student loans	none	0	18-19	2	Other	high		High knowledge	1	0	1	0
595	Private	1	1	2	3	1	5	15	80	75	1	Parents	none	0	20-25	2	Other	medium		low knowlegde	1	0	1	1
596	Public	1	1	1	1	1	95	100	90	90	1	Student loans	none	10	20-25	1	Other	low	<6	low knowlegde	0	1	1	1
597	Public	1	1	4	2	0	85	100	40	100	1	Student loans	none	0	20-25	1	Other	low		High knowledge	1	1	1	0
599	Public	1	1	1	4	0	100	100	90	100	0	Other	none	0	20-25	2		low		High knowledge	0	0	1	1
600	Public	1	1	3	2	0	100	100	50	50	1	Student loans	none	50	20-25	1	Other			low knowlegde	0	1	1	0
601	Public	1	1	4	3	0	95	100	80	70	0	Student loans	none	30	20-25	2	Other		<6	low knowlegde	1	0	1	0
603	Public	1	4	3	4	0	95	95	90	75	0	Student loans	Refuse to answer	21.052631	20-25	1	Other	low		low knowlegde	1	0	0	0
604	Public	1	1	4	1	0	100	100	0	100	1	Parents	Private	0	18-19	2	Other	medium	<6	low knowlegde	0	1	1	0
605	Public	1	1	4	2	0	50	75	55	85	1	Student loans	Private	0	20-25	2	Other	low	<6	low knowlegde	1	1	1	0
606	Public	1	1	1	2	0	100	100	100	100	1	Parents	Private	0	20-25	2	Other	low	<6	High knowledge	0	1	1	1
607	Public	1	2	1	1	0	25	75	75	100	0	Student loans	none	0	18-19	1	Student residence	low		low knowlegde	0	1	1	1
608	Public	2	1	2	2	0	100	100	5	25	1	Student loans	none	75	18-19	1	Student residence	medium	<6	low knowlegde	0	1	1	1
609	Public	2	1	1	1	0	100	100	100	100	1	Student loans	none	0	18-19	1	Student residence	low	<6	High knowledge	0	1	1	1
611	Public	1	2	2	2	0	5	95	15	50	1	Student loans	none	47.36842	20-25	2	Other	medium	6 to <12	low knowlegde	0	1	1	1
612		2	1	2	2	0	100	100	25	50	1	Other	Private	50	20-25	1	Student residence		<6	low knowlegde	0	1	1	1
613	Public	2	1	1	1	0	95	100	25	95	1	Student loans	Private	5	18-19	1	Student residence		<6	High knowledge	0	1	1	1
614	Public	1	1	2	2	0	85	100	50	100	1	Parents	none	0	18-19	1	Other		24+	low knowlegde	0	1	1	1
615	Public	1	1	1		0	85	100	50	85	1	Parents	none	15	20-25	2	Other	high	<6	low knowlegde	0		1	1
616	Public	1	1	1	1	0	60	100	35	100	1	Parents	none	0	18-19	1	Other	high	<6	High knowledge	0	1	1	1
618	Public	2	1	1	1	0	100	100	100	100	1	Parents	Private	0	18-19	2	Other	high	<6	High knowledge	0	1	1	1
619	Public	2	1	3	1	0	100	100	100	100	1	Parents	none	0	20-25	1	Other	medium	<6	low knowlegde	0	1	1	0
620	Public	1	1	1	2	1	95	100	95	100	1		none	0	20-25	1	Student residence	high	<6	low knowlegde	0	1	1	1
621	Public	2	1	3	2	0	65	95	60	60	1	Parents	none	36.842106	18-19	2	Other	high		High knowledge	0	1	1	0
622	Public	2	3	2	2	0	40	50	80	90	0	Parents	Private	0	20-25	2	Other	medium	<6	low knowlegde	1	1	0	1
623	Private	2	1	1	3	0	75	100	50	75		Parents	Private	25	20-25	1	Other		<6	High knowledge	0	0	1	1
624	Private	1	1	1	2	1	90	100	50	80	1	Parents	Refuse to answer	20	18-19	2	Other			low knowlegde	0	1	1	1
625	Public	2	1	4	4	0	50	50	50	50		Parents	Refuse to answer	0	20-25	1	Other			low knowlegde	1	0	1	0
626	Public	2	1	2	2	1	100	100	50	50	1	Parents	Refuse to answer	50	18-19	1	Other			low knowlegde	0	1	1	1
627	Public	2	1	1	2	0	100	100	100	100	1	Parents	none	0	18-19	1	Other	medium	<6	low knowlegde	0	1	1	1
628	Private	2	4	4	2	0	80	100	95	70	1	Parents	none	30	20-25	1	Student residence	medium	<6	High knowledge	1	1	0	0
629	Public	2	1	4	1	1	100	100	100	100	1	Student loans	Private	0	20-25	1	Student residence	high	<6	High knowledge	1	1	1	0
630	Public	2	1	1	2	0	95	100	50	0	1	Student loans	none	100	20-25	2	Student residence	medium	<6	low knowlegde	0	1	1	1
631	Public	2	1	3	1	0	90	100	100	100	1	Student loans	none	0	18-19	1	Student residence	medium	<6	High knowledge	0	1	1	0
632	Public	2	1	2	4	1	100	100	60	85	1	Student loans	none	15	18-19	2	Student residence	medium	6 to <12	High knowledge	1	0	1	1
633	Public	1	1	4	4	1	100	100	100	100	1	Parents	none	0	20-25	1	Student residence	high	<6	low knowlegde	1	0	1	0
634	Private	2	2	1	2	0	60	100	35	100	1	Other	none	0	18-19	2	Other		<6	low knowlegde	0	1	1	1
635	Public	2	1	2	3	0	95	100	50	60	1	Student loans	none	40	20-25	2	Student residence	low	<6	low knowlegde	0	0	1	1
636	Public	2	1	4	4	0	100	100	100	100	1	Parents	Private	0	20-25	1	Other	high		High knowledge	1	0	1	0
637	Private	2	1	4	4	0	90	95	95	95	1	Parents	Private	0	18-19	1	Student residence	high		High knowledge	1	0	1	0
638	Public	2	1	2	2	0	50	95	30	60	1	Student loans	Private	36.842106	20-25	1	Student residence		<6	High knowledge	0	1	1	1
639	Public	2	1	1	1	0	100	100	100	100	1	Parents	Refuse to answer	0	18-19	2	Other	high	<6	low knowlegde	0	1	1	1
640	Public	1	1	1	2	0	80	100	65	75	1	Other	none	25	20-25	1	Student residence	medium		low knowlegde	0	1	1	1
641	Public	2	1	2	2	0	75	90	25	50	1	Parents	none	44.444443	20-25	1	Other	low		low knowlegde	0	1	1	1
642	Public	1	1	2	1	1	95	55	40	95	1	Student loans	none	0	20-25	1	Student residence			low knowlegde	0	1	1	1
643	Public	2	1	4	4	0	55	100	100	100		Parents	Refuse to answer	0	20-25	1	Student residence			low knowlegde	1	0	1	0
644	Public	2	1	4	3	0	75	90	70	60	1	Parents	none	33.333332	20-25	1	Other	medium		High knowledge	1	0	1	0
645	Public	2	1	4	4	0	70	100	95	100	1	Parents	none	0	18-19	1	Other			low knowlegde	1	0	1	0
646	Public	2	1	2	2	0	100	100	100	100	0	Student loans	none	0	18-19	2	Other		6 to <12	High knowledge	0	1	1	1
647	Public	2	1	1	1	0	100	100	100	50	1	Parents	none	50	20-25	1	Student residence	low	<6	low knowlegde	0	1	1	1
648	Private	2	2	3	2	0	100	100	80	100		Parents	Refuse to answer	0	20-25	2	Other		24+	low knowlegde	1	1	1	0
649	Public	2	1	4	3	0	50	100	80	100	1	Parents	Refuse to answer	0	18-19	2	Student residence	low		High knowledge	1	0	1	0
650	Public	2	1	4	4	0	50	100	50	100	1	Parents	none	0	18-19	1	Other	low		low knowlegde	1	0	1	0
651	Public	2	1	2	2	0	90	90	85	85	1	Other	none	5.5555553	18-19	1	Other	medium		low knowlegde	0	1	1	1
652	Private	2	1	4	4	0	60	100	100	100	1	Parents	none	0	18-19	1	Student residence	medium		low knowlegde	1	0	1	0
653	Public	2	2	2	1	1	65	65	65	35	1	Parents	none	46.153847	18-19	2	Student residence	medium		low knowlegde	0	1	1	1
654	Public	2	1	2	1	0	95	100	50	60	1	Student loans	none	40	18-19	1	Student residence	low	<6	low knowlegde	0	1	1	1
655	Public	2	1	4	1	1	90	90	40	50	1	Other	none	44.444443	20-25	2	Other	low		High knowledge	1	1	1	0
656	Public	2	1	4	2	0	90	100	60	80	1	Student loans	Refuse to answer	20	20-25	1	Student residence	medium		High knowledge	1	1	1	0
657	Public	2	1	4	1	0	100	100	80	90	1	Parents	none	10	20-25	2	Other			High knowledge	0	1	1	0
658	Public	2	2	2	1	1	100	100	25	10	1	Parents	none	90	18-19	1	Student residence	low	6 to <12	low knowlegde	0	1	1	1
659	Public	2	1	1	1	0	95	100	20	25	1	Parents	none	75	18-19	1	Other		6 to <12	low knowlegde	0	1	1	1
660	Public	2	3	3	3	0	50	40	25	10	1	Parents	none	75	18-19	2	Other	medium		low knowlegde	1	0	0	0
661	Public	2	1	2	1	0	35	70	25	60	0	Other	none	14.285714	20-25	2	Student residence	low	<6	High knowledge	0	1	1	1
662	Public	2	1	1	1	1	75	100	25	90	1	Parents	none	10	20-25	2	Other	medium		High knowledge	0	1	1	1
663	Public	2	1	2	1	1	55	10	0	0	1	Parents	Private	100	18-19	1	Other			High knowledge	0	1	1	1
664	Public	2	1	4	4	0	100	100	100	100	1	Parents	Private	0	18-19	1	Student residence	high		low knowlegde	1	0	1	0
665	Public	2	1	3	2	1	5	5	55	60	1	Parents	none	0	20-25	2	Other	low	6 to <12	High knowledge	1	1	1	0
666		2	2	2	1	0	50	85	35	45	1	Parents	Private	47.058823	20-25	1	Other	high	<6	low knowlegde	0	1	1	1
667		2	1	4	2	0	85	60	65	70	1	Parents	none	0	20-25	2	Other		<6	low knowlegde	1	1	1	0
668	Public	1	1	1	2	1	100	100	100	25	1	Other	none	75	18-19	1	Student residence	high	<6	High knowledge	0	1	1	1
669	Public	1	1	1	1	0	90	100	95	40	1	Student loans	none	60	20-25	1	Student residence	medium	<6	High knowledge	0	1	1	1
671	Private	2	2	3	2	0	80	100	50	50	1	Parents	none	50	18-19		Student residence	medium	<6	low knowlegde	1	1	1	0
672	Public	1	1	1	4	0	85	50	100	35	1	Student loans	none	30	18-19	1	Student residence	low	<6	High knowledge	0	0	1	1
673		1	1	4	2	0	25	0	0	0	1	Student loans	none		20-25	1	Student residence	low	24+	High knowledge	1	1	1	0
674	Public	1	1	3	2	0	85	100	65	85		Parents	none	15	20-25	2			<6	low knowlegde	0	1	1	0
675	Public	1	1	1	4	0	65	100	65	75	1	Student loans	Private	25	20-25	2	Student residence	high	<6	High knowledge	0	0	1	1
676	Public	2	1	4	1	0	45	95	85	75	1	Student loans	none	21.052631	18-19	1	Student residence	medium		High knowledge	0	1	1	0
677	Public	2	1	4	4	0	70	100	45	70	1	Other	none	30	18-19	1	Other	medium		High knowledge	1	0	1	0
679	Public	2	1	4	1	0	60	90	50	80	1	Student loans	none	11.111111	18-19	2	Student residence	low	<6	High knowledge	0	1	1	0
680	Public	1	1	1	1	0	75	45	75	45	1	Parents	Refuse to answer	0	20-25	1	Other	low		low knowlegde	0	1	1	1
682	Public	1	1	3	1	0	95	75	75	100	1	Parents	none	0	20-25	1	Other	low	<6	low knowlegde	0	1	1	0
683	Public	1	1	4	1	0	90	90	85	90	1	Student loans	none	0	20-25	2	Student residence	medium	<6	High knowledge	0	1	1	0
684	Public	1	1	1	1	0	85	50	75	100	0	Parents	Private	0	20-25	2	Other	medium	<6	low knowlegde	0	1	1	1
686	Public	1	1	1	1	1	85	100	50	50	1	Parents	none	50	18-19	1	Other	high		low knowlegde	0	1	1	1
687	Public	1	1	3	1	0	100	50	70	50	1	Parents	none	0	20-25	1	Other	medium	6 to <12	low knowlegde	0	1	1	0
688	Public	1	1	3	2	0	60	95	45	80	1	Student loans	none	15.789474	20-25	1	Student residence	low	<6	low knowlegde	0	1	1	0
689	Public	2	1	4	4	0	80	100	0	0	1	Student loans	none	100	18-19	1	Student residence		<6	High knowledge	1	0	1	0
690	Public	1	1	2	4	0	5	5	5	15	0	Parents	none	0	20-25	1	Student residence	low	<6	High knowledge	1	0	1	1
691	Public	2	1	4	3	0	5	5	5	5	1	Student loans	none	0	20-25	1	Student residence		6 to <12	low knowlegde	1	0	1	0
692	Public	2	1	2	2	1	75	100	50	100	1	Student loans	none	0	20-25	2	Other	medium		High knowledge	0	1	1	1
693	Public	2	1	1	2	1	60	50	70	55	1	Student loans	none	0	20-25	1	Student residence	medium	<6	low knowlegde	0	1	1	1
694	Public	1	1	4	3	0	25	60	100	75	1	Parents	Private	0	20-25	2	Other	high		low knowlegde	1	0	1	0
695	Public	2	1	3	2	0	60	100	80	90	1	Student loans	none	10	18-19	1	Student residence	low	6 to <12	High knowledge	0	1	1	0
696	Public	2	1	3	2	1	75	100	65	90	0	Student loans	none	10	20-25	1	Student residence	low	6 to <12	High knowledge	1	1	1	0
697	Public	1	1	1	4	0	75	100	30	90	1	Parents	none	10	20-25	2	Other	low	24+	low knowlegde	0	0	1	1
698	Public	1				0	30	85	50	75	1	Student loans	Private	11.764706	20-25	2	Other	medium		low knowlegde	0
699	Public	2	1	4	3	1	90	90	90	85	1	Student loans	none	5.5555553	18-19	1	Student residence	medium	<6	High knowledge	1	0	1	0
700	Public	1	1	1	1	1	100	100	100	100	1	Student loans	none	0	20-25	1	Student residence	medium	6 to <12	High knowledge	0	1	1	1
701		2	2	3	3	1	100	85	95	95	1	Student loans	none	0	20-25	2	Student residence		<6	low knowlegde	1	0	1	0
702	Private	1	1	2	3	0	20	55	15	20		Parents	Refuse to answer	63.636364	18-19	2				low knowlegde	0	0	1	1
703	Public	1	1	2	1	0	85	50	55	60	1	Parents	Refuse to answer	0	18-19	1	Other			High knowledge	0	1	1	1
704	Public	2	1	4	1	1	100	100	50	45	1	Student loans	none	55	20-25	1	Student residence	medium	<6	High knowledge	1	1	1	0
706	Public	2	1	3	3	0	100	100	60	60	1	Student loans	none	40	18-19	1	Student residence	low	6 to <12	low knowlegde	1	0	1	0
707	Public	2	1	2	3	1	85	100	95	100	1	Student loans	none	0	18-19	1	Student residence	low		High knowledge	1	0	1	1
708		1	1	1	1	0	100	100	50	100	1	Student loans	none	0	20-25	2	Student residence	high	<6	High knowledge	0	1	1	1
709		1	1	2	1	0	100	100	15	10	1	Other	none	90	18-19	2	Student residence			High knowledge	0	1	1	1
710		1	1	1	1	1	95	100	75	70	1	Other	none	30	18-19	1	Other			High knowledge	0	1	1	1
711	Public	2	1	4	3	0	100	100	100	100		Student loans	Refuse to answer	0	20-25	2	Other		<6	High knowledge	1	0	1	0
712	Public	2	2	2	2	1	60	75	20	50	1	Other	none	33.333332	20-25	1	Student residence	low	<6	low knowlegde	1	1	1	1
713	Public	2	1	4	2	0	100	100	90	100	1	Student loans	none	0	20-25	1	Student residence	low	<6	High knowledge	1	1	1	0
714	Public	2	1	4	1	0	25	100	0	100	1	Other	none	0		1	Student residence	medium		High knowledge	0	1	1	0
715	Public	2	1	4	1	1	100	100	90	100	1	Student loans	Private	0	18-19	1	Student residence	low	<6	High knowledge	1	1	1	0
716	Public	2	1	4	4	0	5	100	75	100	0	Student loans	none	0	20-25	1	Student residence			High knowledge	1	0	1	0
717	Public	2	1	4	3	1	100	100	100	100		Student loans	Private	0	18-19	1	Student residence		<6	High knowledge	1	0	1	0
718	Public	1	1	1	2	0	90	100	90	100	1	Parents	Private	0	18-19	1	Other	high	12 to <24	low knowlegde	0	1	1	1
719	Public	2	1	3	2	0	95	70	65	80	1	Parents	none	0	20-25	1	Student residence	low	<6	High knowledge	0	1	1	0
720	Public	1	1	3	3	1	100	100	75	75		Student loans	none	25	18-19	2	Student residence		<6	High knowledge	1	0	1	0
721	Public	2	2	3	2	0	65	65	80	50	1	Student loans	none	23.076923	20-25	2	Student residence		<6	low knowlegde	1	1	1	0
723	Public	1	2	3	1	0	100	100	75	100		Parents	Refuse to answer	0	18-19	2	Other			low knowlegde	0	1	1	0
724	Public	2	1	2	3	1	65	85	55	90		Student loans	Private	0	20-25	1	Other		<6	low knowlegde	1	0	1	1
725	Public	2	1	4	3	0	100	10	85	10	1	Parents	Private	0	20-25	2	Other	high		High knowledge	1	0	1	0
726	Public	2	1	1	1	0	85	100	60	20	1	Other	none	80	20-25	2	Student residence	medium	<6	High knowledge	0	1	1	1
727	Public	2	1	1	1	1	100	100	100	100	0	Student loans	none	0	20-25	1	Other	low	<6	High knowledge	0	1	1	1
728	Public	1	4	4	4	0	65	100	55	100	1	Student loans	Private	0	18-19	1	Other	high		low knowlegde	1	0	0	0
729	Public	2	1	1	1	0	75	85	35	50	0	Student loans	Private	41.176472	20-25	1	Student residence	low		low knowlegde	0	1	1	1
730	Private	1	1	1	3	0	60	100	65	90		Student loans	Private	10	20-25	1	Student residence		<6	low knowlegde	0	0	1	1
731	Public	2	1	2	2	0	50	90	60	75	1	Parents	Refuse to answer	16.666666	18-19	1	Other	high		low knowlegde	0	1	1	1
732	Private	2	1	4	1	1	90	100	5	0	1	Student loans	none	100	20-25	1	Other	low		High knowledge	1	1	1	0
734	Public	2	1	4	1	0	0	100	100	0		Student loans	Refuse to answer	100	18-19	2	Other			High knowledge	0	1	1	0
735	Public	2	1	1	2	0	100	100	75	90	1	Student loans	none	10	20-25	2	Student residence	low	<6	High knowledge	0	1	1	1
736	Private	2	1	1	3	1	95	100	75	65	1	Student loans	Private	35	18-19	1	Student residence	high	24+	High knowledge	0	0	1	1
737	Public	2	1	1	1	1	65	100	60	80	1	Student loans	none	20	20-25	2	Other	medium	6 to <12	low knowlegde	0	1	1	1
739	Public	2	2	1	3	0	100	100	60	100	1	Student loans	none	0	18-19	2	Student residence	high		High knowledge	0	0	1	1
740		2	3	4	1	0	100	100	50	100	1	Parents	none	0	18-19	2	Other	low	<6	low knowlegde	1	1	0	0
741	Public	2	1	4		1	50	100	80	100	1	Student loans	none	0	18-19	1	Student residence	low		low knowlegde	0		1	0
742	Public	2	1	2	2	0	100	100	100	100	1	Student loans	none	0	18-19	2	Other	medium		High knowledge	0	1	1	1
745	Public	2	1	3	1	0	100	100	80	70	1	Student loans	Refuse to answer	30	18-19	2	Student residence	medium	12 to <24	High knowledge	0	1	1	0
746	Public	2	1	1	1	0	65	100	35	50	0	Student loans	none	50	20-25	2	Other	medium	6 to <12	High knowledge	0	1	1	1
747	Public	2	1	2	1	1	60	60	60	15	1	Student loans	none	75	18-19	2	Student residence	high		High knowledge	0	1	1	1
748	Public	2	3	2	1	1	50	50	95	75	1	Parents	Private	0	20-25	2	Other	medium	<6	low knowlegde	1	1	0	1
749	Public	2	1	4	4	1	100	100	100	100	1	Student loans	none	0	20-25	2	Student residence	low	<6	High knowledge	1	0	1	0
750	Public	1	2	2	2	0	40	45	35	60	1	Parents	none	0	20-25	2	Other	high	<6	low knowlegde	0	1	1	1
751	Public	1	1	4	1	1	35	90	100	100	1	Student loans	none	0	20-25	1	Student residence	medium	<6	High knowledge	1	1	1	0
752	Public	1	1	2	2	0	100	100	75	75	0	Parents	Refuse to answer	25	18-19	1		low	6 to <12	low knowlegde	0	1	1	1
753	Public	1	1	4	3	0	100	100	30	65	1	Student loans	none	35	20-25	1	Student residence	medium	6 to <12	High knowledge	1	0	1	0
755	Public	1	1	3	4	0	90	100	95	100	1	Other	none	0	20-25	2	Student residence	low	<6	low knowlegde	1	0	1	0
756	Public	1	1	3	2	0	75	50	100	100	1	Student loans	none	0	20-25	1	Student residence			low knowlegde	0	1	1	0
757	Public	1	1	1	1	0	75	90	60	65	1	Student loans	Private	27.777779	20-25	2	Student residence	low	<6	High knowledge	0	1	1	1
758	Public	1	2	2	1	0	60	100	75	100	1	Student loans	none	0	18-19	1	Student residence			low knowlegde	0	1	1	1
759	Public	1	2	2	2	0	75	100	60	75	1	Parents	Private	25	20-25	1	Student residence	low	<6	low knowlegde	0	1	1	1
760	Private	1	1	4	1	1	90	100	50	45	1	Student loans	Private	55	20-25	2	Student residence	high	<6	High knowledge	1	1	1	0
761		1	1	1	1	1	100	100	50	50	1	Student loans	none	50	20-25	2	Student residence	medium	<6	High knowledge	0	1	1	1
762	Public	1	1	2	2	1	75	95	75	60	1	Student loans	Refuse to answer	36.842106	20-25	2	Student residence	medium	<6	low knowlegde	0	1	1	1
763	Public	1	1	2	2	1	100	100	75	75	1	Student loans	Refuse to answer	25	18-19	2	Other	high		High knowledge	0	1	1	1
764		1	1	4	1	0	100	100	75	75	1	Student loans	Refuse to answer	25	20-25	2	Student residence	low	6 to <12	High knowledge	0	1	1	0
766	Public	1	1	1	1	1	100	100	100	100	1	Other	none	0	18-19	1	Student residence	medium	<6	High knowledge	0	1	1	1
768	Public	1	1	4	1	1	90	100	85	100	1	Other	none	0	20-25	1	Other	medium	<6	High knowledge	1	1	1	0
770	Public	2	1	4	2	1	60	100	45	45	1	Student loans	none	55	20-25	2	Student residence	medium	<6	low knowlegde	1	1	1	0
771	Public	1	1	2	2	1	100	100	95	90	1	Parents	none	10	20-25	2	Student residence	medium		low knowlegde	0	1	1	1
772	Private	1	1	1	2	0	15	15	40	35	1	Parents	none	0	18-19	1	Other	high		low knowlegde	0	1	1	1
774	Public	1	2	1	3	1	100	65	0	0	1	Parents	none	100	20-25	1	Other	low	<6	low knowlegde	1	0	1	1
775	Private	1	1	3	2	0	70	60	45	30	1	Parents	none	50	20-25	2	Other			low knowlegde	0	1	1	0
777	Public	2	1	4	1	0	100	100	100	100	1	Student loans	none	0	18-19	2	Other	medium	<6	High knowledge	0	1	1	0
778	Public	1	1	1	2	0	60	100	35	50	1	Other	none	50	18-19	2	Student residence	low		low knowlegde	0	1	1	1
779	Public	1	4	1	1	0	100	100	100	100	1	Student loans	Refuse to answer	0	20-25	2	Student residence		<6	low knowlegde	0	1	0	1
780	Public	1	1			0	60	90	100	100	1	Student loans	Private	0	20-25	2	Student residence	high	<6	low knowlegde	0		1
781	Public	1	1	1	1	0	100	100	85	50	1	Student loans	none	50	18-19	2	Student residence	medium	6 to <12	High knowledge	0	1	1	1
782	Public	1	1	1	2	1	100	100	90	95	1	Student loans	Private	5	18-19	2	Student residence	high	<6	High knowledge	0	1	1	1
783	Public	2	1	4	4	0	85	100	90	55	1	Student loans	none	45	20-25	1	Student residence	medium		low knowlegde	1	0	1	0
784	Public	1	1	4	4	0	65	100	50	75	1	Student loans	none	25	18-19	1	Other	medium		High knowledge	1	0	1	0
785	Public	2	1	2	2	0	95	100	95	100	1	Student loans	none	0	18-19	1	Student residence	low		low knowlegde	0	1	1	1
786	Public	1	1	4	4	0	60	70	55	85	1	Parents	Private	0	20-25	2	Other	high		low knowlegde	1	0	1	0
787	Public	2	1	4	1	1	15	70	10	5	1	Parents	none	92.85714	20-25	2	Other	high	24+	High knowledge	1	1	1	0
788	Public	1	1	1	4	0	100	100	100	80	1	Student loans	none	20	20-25	1	Student residence	medium		low knowlegde	0	0	1	1
789	Public	1	1	4	2	0	75	60	75	75	1	Parents	Private	0	20-25	2	Other	high		low knowlegde	1	1	1	0
790	Public	1	2	4	2	0	25	0	50	60	1	Student loans	none		20-25	1	Other	high		low knowlegde	1	1	1	0
791	Public	1	1	2	3	0	70	100	50	60	1	Parents	Private	40	20-25	1	Other	high		low knowlegde	0	0	1	1
792	Public	2	1	4	1	0	90	100	50	60	1	Parents	Private	40	18-19	2	Other	medium		High knowledge	0	1	1	0
793	Public	2	1	4	1	0	90	100	50	75	1	Student loans	Private	25	18-19	2	Other	high		High knowledge	0	1	1	0
794	Public	1	2	3	2	0	75	90	95	50	1	Parents	Private	44.444443	20-25	2	Student residence	low		low knowlegde	1	1	1	0
795	Public	2	1	4	1	0	100	100	100	100	1	Student loans	none	0	18-19	1	Student residence	medium	<6	High knowledge	0	1	1	0
796	Public	1	2	3	2	0	100	100	5	70	0	Parents	none	30	20-25	1	Student residence	low		low knowlegde	1	1	1	0
797	Public	1	1	3	2	0	100	65	25	65	0	Parents	none	0	20-25	1	Other		24+	High knowledge	0	1	1	0
798	Public	1	1	2	4	1	100	100	85	75	1	Parents	Refuse to answer	25	18-19	1	Other	medium	<6	High knowledge	1	0	1	1
799	Public	1	1	4	1	0	100	100	30	100	1	Parents	Private	0	20-25	2	Student residence	low	<6	High knowledge	0	1	1	0
800	Public	2	1	1	3	0	100	100	100	100	1	Parents	none	0	18-19	1	Student residence		6 to <12	low knowlegde	0	0	1	1
801	Public	1	1	1	2	0	100	100	100	100	1	Student loans	Private	0	20-25	1	Student residence	high		High knowledge	0	1	1	1
802	Public	1	1	4	4	1	75	100	50	100	1	Student loans	Refuse to answer	0	18-19	2	Student residence	low	<6	High knowledge	1	0	1	0
803	Public	1	1	1	1	0	65	100	45	55	0	Parents	none	45	20-25	1	Other	high		low knowlegde	0	1	1	1
804	Public	1	1	1	1	0	65	100	45	95	1	Parents	none	5	18-19	2	Other	high		low knowlegde	0	1	1	1
805	Private	1	1	3	2	0	100	100	100	100	1	Parents	Refuse to answer	0	20-25	2	Other			low knowlegde	0	1	1	0
806	Public	2	1	1	4	1	75	90	85	100	1	Parents	Private	0	20-25	1	Other	high	<6	High knowledge	1	0	1	1
807	Public	2	1	2	4	1	65	100	100	100	1	Parents	none	0	20-25	1	Other	high	<6	High knowledge	1	0	1	1
808	Public	1	1	2	2	1	100	100	50	60	1	Student loans	none	40	20-25	2	Student residence			low knowlegde	0	1	1	1
809	Public	1	1	2	2	0	95	65	95	100	1	Parents	none	0	20-25	2	Other	high	<6	High knowledge	0	1	1	1
810	Public	2	3	2	2	0	100	100	90	90	1	Student loans	none	10	20-25	1	Student residence	high	<6	low knowlegde	1	1	0	1
811	Public	1	2	1	2	0	100	100	15	35	1	Student loans	none	65	18-19	2	Student residence	medium	<6	low knowlegde	0	1	1	1
812	Public	2	1	4	4	1	70	100	40	90	1	Student loans	Private	10	18-19	1	Other	high		High knowledge	1	0	1	0
813	Public	2	1	1	4	1	60	100	35	85	1	Student loans	none	15	18-19	1	Student residence	high		High knowledge	1	0	1	1
814	Public	2	1	4	4	1	65	100	50	100	1	Student loans	none	0	18-19	1	Student residence	high		High knowledge	1	0	1	0
815	Public	1	1	4	1	0	100	100	60	90	1	Parents	none	10	20-25	2	Other			low knowlegde	0	1	1	0
816	Public	1	1	1	4	0	100	100	100	100	1	Parents	none	0	20-25	1	Student residence	medium	12 to <24	High knowledge	0	0	1	1
817		1	3	2	2	1	80	55	45	85	1	Parents	Private	0	20-25	2	Other	medium	<6	low knowlegde	1	1	0	1
818	Public	1	4	1	3	1	80	100	10	85	1	Student loans	none	15	20-25	1	Other	low	<6	low knowlegde	1	0	0	1
819	Public	1	1	2	3	0	60	100	85	95	0	Student loans	none	5	20-25	1	Student residence			High knowledge	0	0	1	1
820	Public	1	1	4	2	1	60	90	60	75	0	Student loans	none	16.666666	20-25	2	Other	low	24+	High knowledge	1	1	1	0
821	Public	2	1	1	2	1	100	100	50	55	1	Parents	none	45	18-19	1		medium		High knowledge	0	1	1	1
822		2	1	1	2	1	50	5	20	5	1	Student loans	none	0	18-19	1	Other	low		High knowledge	0	1	1	1
823		1	1	4	2	0	90	100	100	100	1	Parents	Private	0	20-25	1	Student residence	high	<6	low knowlegde	1	1	1	0
824	Private	1	1	4	1	0	80	90	85	65	0	Student loans	none	27.777779	20-25	1	Student residence	low		low knowlegde	0	1	1	0
825	Public	1	1	4	4	0	75	45	25	55	1	Student loans	none	0	20-25	1	Student residence	low	12 to <24	High knowledge	1	0	1	0
826	Public	2	2	2	2	0	85	85	60	60	1	Student loans	none	29.411764	18-19	1	Student residence	low	<6	low knowlegde	0	1	1	1
828		1	1	1	2	0	100	100	100	100	1	Student loans	none	0	18-19	1	Other			low knowlegde	0	1	1	1
